# Supplementary material
Source: HighWire-hosted journal article supplement (https://ijssurgery.com/content/8419)
Supplement: inline-supplementary-material-1 [file inline-supplementary-material-1.docx]

**Appendix A.** Cpt Codes For NSQIP ASD patients

| ASD CPT codes | 22846, 22845, 22842, 28800, 22802, 22804, 22808, 22810, 22214, 22843 |
| --- | --- |
